# Supplementary material
Source: ML conference proceedings conference paper supplement (https://openreview.net/forum?id=wyCdmAJJY1F)
Supplement: supplementary_material [file attachment]

# Appendix

## Table of Contents

---

|          |                                                                                 |           |
|----------|---------------------------------------------------------------------------------|-----------|
| <b>A</b> | Theoretical Proofs . . . . .                                                    | <b>13</b> |
| <b>B</b> | Environment Details . . . . .                                                   | <b>15</b> |
|          | B.1 Simulator . . . . .                                                         | 15        |
|          | B.2 Definitions of Nodes and Edges in Causal Graph and Behavior Graph . . . . . | 16        |
| <b>C</b> | Model Training Details . . . . .                                                | <b>16</b> |
| <b>D</b> | More Experiment Results . . . . .                                               | <b>17</b> |
|          | D.1 Qualitative Results of Generated Scenarios . . . . .                        | 17        |
|          | D.2 Diversity of Generated Scenarios . . . . .                                  | 17        |

---

## A Theoretical Proofs

**Definition 4** (Structural Hamming Distance (SHD)). *For any two DAGs  $\mathcal{G}_1^C, \mathcal{G}_2^C$  with identical vertices set  $V$ , we define the following function SHD:  $\mathcal{G} \times \mathcal{H} \rightarrow \mathbb{R}$ ,*

$$\begin{aligned} SHD(\mathcal{G}_1^C, \mathcal{G}_2^C) &= \#\{(i, j) \in V^2 \mid \mathcal{G}_1^C \text{ and } \mathcal{G}_2^C \text{ have different edges } e_{ij}\} \\ &\triangleq \sum_{j \in V} |\mathbf{PA}_j(\mathcal{G}_1^C) - \mathbf{PA}_j(\mathcal{G}_2^C)| \end{aligned} \quad (6)$$

where  $|\mathbf{PA}_j(\mathcal{G}_1^C) - \mathbf{PA}_j(\mathcal{G}_2^C)|$  is the number of the absolute difference in parental nodes for node  $j$  between causal graph  $\mathcal{G}_1^C$  and  $\mathcal{G}_2^C$ .

**Definition 5** (Nodes in Behavior Graph). *Let  $X_j = [V_j, \{E_{ij}\}_{i \in \{\mathbf{PA}_j(\mathcal{G}^C) \cup j\}}]$ , where  $V_i$  is the node type of the  $j$ -th node, and  $E_{.i}$  is the arrows that point in the  $j$ -th node. All these components form the node  $X_j$  in the behavior graph.*

**Definition 6** (Respect the graph). *For any given behavior graph  $\mathcal{G}^B$  with a specific causal graph  $\mathcal{G}^C$ , the transition model respects the graph if the distribution  $p_\phi(\mathcal{G}^B | \mathcal{G}^C)$  can be factorized as:*

$$p(\mathcal{G}^B | \mathcal{G}^C) = \prod_{j \in [m]} p(X_j | \mathbf{PA}_j(\mathcal{G}^C)) \quad (7)$$

where  $m$  is the number of factorized nodes, and  $\mathbf{PA}_j(\cdot)$  is for  $X_j$ 's parents based on the causal graph.

**Proposition 1** (CausalAF respects the graph).

$$\begin{aligned} p_\phi(\mathcal{G}^B | \mathcal{G}^C) &= \prod_{j \in [m]} \left[ \underbrace{p_\phi(V_j | \mathbf{PA}_j(\mathcal{G}^C))}_{COM} \underbrace{p_\phi(E_{jj} | V_j, \mathbf{PA}_j(\mathcal{G}^C)) \prod_{i \in \mathbf{PA}_j(\mathcal{G}^C)} p_\phi(E_{ij} | V_j, \mathbf{PA}_j(\mathcal{G}^C))}_{CVM} \right] \\ &= \prod_{j \in [m]} \left[ p_\phi(V_j, E_{jj} | \mathbf{PA}_j(\mathcal{G}^C)) \prod_{i \in \mathbf{PA}_j(\mathcal{G}^C)} p_\phi(E_{ij} | V_j, \mathbf{PA}_j(\mathcal{G}^C)) \right] \\ &= \prod_{j \in [m]} p_\phi(V_j, \{E_{ij}\}_{i \in \{\mathbf{PA}_j(\mathcal{G}^C) \cup j\}} | \mathbf{PA}_j(\mathcal{G}^C)) \\ &= \prod_{j \in [m]} p_\phi(X_j | \mathbf{PA}_j(\mathcal{G}^C)) \end{aligned} \quad (8)$$

The node generation process of CausalAF combines two phases: firstly, we use COM to determine the generation order of the node, which prevents the generation of child nodes before their parent nodes. This COM can also be interpreted as a node ordering with topological sorting, therefore CausalAF should always respect the term  $p(V_j|\mathbf{PA}_j(\mathcal{G}^C)), \forall j$  in Equation (8).

On the other hand, CVM is used to guarantee that the output of the autoregressive flow model uses proper structural information (i.e. the parents of the current node) to generate the self-loop edge as well as edges between new nodes and their parents accordingly, the CVM trick thus guarantees that CausalAF respects the term  $p(E_{jj}|V_j, \mathbf{PA}_j(\mathcal{G}^C)) \prod_{i \in \mathbf{PA}_j(\mathcal{G}^C)} p(E_{ij}|V_j, \mathbf{PA}_j(\mathcal{G}^C)), \forall j$  in Equation (8).

**Assumption 1** (Local Optimality). Let  $\mathcal{G}^{C*}$  be the ground truth causal graph, for any nodes  $X_j$  with its parental set  $\mathbf{PA}_j(\mathcal{G}_1^C) \neq \mathbf{PA}_j(\mathcal{G}^{C*})$ . At convergence, CausalAF will have  $\max_{\phi} p_{\phi}(V_j|\mathbf{PA}_j(\mathcal{G}^{C*})) > \max_{\phi} p_{\phi}(V_j|\mathbf{PA}_j(\mathcal{G}_1^C))$ .

**Assumption 2** (Local Monotonicity of Behavior Graph). For a single node  $X_j$ , its local monotonicity of likelihood means for any conditional set  $\mathbf{PA}_j(\mathcal{G}_1^C), \mathbf{PA}_j(\mathcal{G}_2^C) \neq \mathbf{PA}_j(\mathcal{G}^C)$ , if  $|\mathbf{PA}_j(\mathcal{G}_1^C) - \mathbf{PA}_j(\mathcal{G}^C)| < |\mathbf{PA}_j(\mathcal{G}_2^C) - \mathbf{PA}_j(\mathcal{G}^C)|$ , and  $\exists v$ , s.t.  $\mathbf{PA}_j(\mathcal{G}_2^C) \cup v = \mathbf{PA}_j(\mathcal{G}_1^C)$ , then  $\max_{\phi} p_{\phi}(X_j|\mathbf{PA}_j(\mathcal{G}_1^C)) > \max_{\phi} p_{\phi}(X_j|\mathbf{PA}_j(\mathcal{G}_2^C))$

*Proof of Theorem 1.* Given that  $\mathcal{G}^B \sim p_{\phi}(\mathcal{G}^B|\mathcal{G}^C), \tau = \mathcal{E}(\mathcal{G}^B)$ , by using the change of variable theorem, we have  $\tau \sim p_{\phi}(\mathcal{E}^{-1}(\tau)|\mathcal{G}^C) |\det \frac{\partial \mathcal{E}^{-1}(\tau)}{\partial \tau}| \triangleq \hat{p}_{\phi}(\tau|\mathcal{G}^C)$ .

The optimization process of CausalAF can be rewritten as below:

$$\begin{aligned}
& \max_{\phi} \mathbb{E}_{\mathcal{G}^B \sim p_{\phi}(\mathcal{G}^B|\mathcal{G}^C)} [\mathbb{1}(D(\mathcal{E}(\mathcal{G}^B))) < \epsilon] \\
&= \max_{\phi} \mathbb{E}_{\hat{p}_{\phi}(\tau|\mathcal{G}^C)} [\mathbb{1}(D(\tau) < \epsilon)] \\
&= \max_{\phi} \hat{p}_{\phi}(D(\tau) < \epsilon|\mathcal{G}^C) \\
&= \max_{\phi} \hat{p}_{\phi}(\mathcal{G}^B \in \mathcal{A}|\mathcal{G}^C), \text{ where } \mathcal{A} = \{\mathcal{G}^B | D(\mathcal{E}(\mathcal{G}^B)) < \epsilon\}
\end{aligned} \tag{9}$$

Since the CausalAF respects the graph, as is shown in Proposition 1, for true CG  $\mathcal{G}^{C*}$  and another CG  $\mathcal{G}_1^C \neq \mathcal{G}^{C*}$ . By applying the local monotonicity in the previous assumptions, when CausalAF converges, we will have

$$\begin{aligned}
\hat{p}_{\phi}(\mathcal{G}^B \in \mathcal{A}|\mathcal{G}_1^C) &= \prod_j \hat{p}_{\phi}(X_j \in \mathcal{A}_j|\mathbf{PA}_j(\mathcal{G}_1^C)) \\
&= \prod_{\substack{\forall j, s.t. \\ \mathbf{PA}_j(\mathcal{G}_1^C) = \mathbf{PA}_j(\mathcal{G}^{C*})}} \hat{p}_{\phi}(X_j \in \mathcal{A}_j|\mathbf{PA}_j(\mathcal{G}_1^C)) \prod_{\substack{\forall j, s.t. \\ \mathbf{PA}_j(\mathcal{G}_1^C) \neq \mathbf{PA}_j(\mathcal{G}^{C*})}} \hat{p}_{\phi}(X_j \in \mathcal{A}_j|\mathbf{PA}_j(\mathcal{G}_1^C)) \\
&< \prod_{\substack{\forall j, s.t. \\ \mathbf{PA}_j(\mathcal{G}_1^C) = \mathbf{PA}_j(\mathcal{G}^{C*})}} \hat{p}_{\phi}(X_j \in \mathcal{A}_j|\mathbf{PA}_j(\mathcal{G}^{C*})) \prod_{\substack{\forall j, s.t. \\ \mathbf{PA}_j(\mathcal{G}_1^C) \neq \mathbf{PA}_j(\mathcal{G}^{C*})}} \hat{p}_{\phi}(X_j \in \mathcal{A}_j|\mathbf{PA}_j(\mathcal{G}^{C*})) \\
&= \prod_j \hat{p}_{\phi}(X_j \in \mathcal{A}_j|\mathbf{PA}_j(\mathcal{G}^{C*})) \\
&= \hat{p}_{\phi}(\mathcal{G}^B \in \mathcal{A}|\mathcal{G}^{C*})
\end{aligned} \tag{10}$$

Then we assume we have another Causal Graph  $\mathcal{G}_2^C \neq \mathcal{G}_1^C$ , if  $SHD(\mathcal{G}_1^C, \mathcal{G}^{C*}) < SHD(\mathcal{G}_2^C, \mathcal{G}^{C*})$ , and  $\exists e$ , s.t.  $E_1^C \cup \{e\} = E_2^C$ ,

$$\begin{aligned}
\hat{p}_\phi(\mathcal{G}^B \in \mathcal{A} | \mathcal{G}_2^C) &= \prod_j \hat{p}_\phi(X_j \in \mathcal{A}_j | \mathbf{PA}_j(\mathcal{G}_2^C)) \\
&= \prod_{\substack{\forall j, s.t. \\ \mathbf{PA}_j(\mathcal{G}_1^C) = \mathbf{PA}_j(\mathcal{G}_2^C)}} \hat{p}_\phi(X_j \in \mathcal{A}_j | \mathbf{PA}_j(\mathcal{G}_2^C)) \prod_{\substack{\forall j, s.t. \\ \mathbf{PA}_j(\mathcal{G}_1^C) \neq \mathbf{PA}_j(\mathcal{G}_2^C)}} \hat{p}_\phi(X_j \in \mathcal{A}_j | \mathbf{PA}_j(\mathcal{G}_2^C)) \\
&< \prod_{\substack{\forall j, s.t. \\ \mathbf{PA}_j(\mathcal{G}_1^C) = \mathbf{PA}_j(\mathcal{G}_2^C)}} \hat{p}_\phi(X_j \in \mathcal{A}_j | \mathbf{PA}_j(\mathcal{G}_1^C)) \prod_{\substack{\forall j, s.t. \\ \mathbf{PA}_j(\mathcal{G}_1^C) \neq \mathbf{PA}_j(\mathcal{G}_1^C)}} \hat{p}_\phi(X_j \in \mathcal{A}_j | \mathbf{PA}_j(\mathcal{G}_1^C)) \\
&= \prod_j \hat{p}_\phi(X_j \in \mathcal{A}_j | \mathbf{PA}_j(\mathcal{G}_1^C)) \\
&= \hat{p}_\phi(\mathcal{G}^B \in \mathcal{A} | \mathcal{G}_1^C)
\end{aligned} \tag{11}$$

Based on the derivation above, we conclude that  $\hat{p}_\phi(\mathcal{G}^B \in \mathcal{A} | \mathcal{G}_2^C) < \hat{p}_\phi(\mathcal{G}^B \in \mathcal{A} | \mathcal{G}_1^C) < \hat{p}_\phi(\mathcal{G}^B \in \mathcal{A} | \mathcal{G}^{C*})$ , which indicates that at convergence, the likelihood of collision samples converge with monotonicity guarantees:

$$p_\phi(D(\tau) < \epsilon | \mathcal{G}_2^C) < p_\phi(D(\tau) < \epsilon | \mathcal{G}_1^C) < p_\phi(D(\tau) < \epsilon | \mathcal{G}^{C*}) \tag{12}$$

□

Table 3: Parameters of Environments

| Parameter   | Description                                  | Value    |
|-------------|----------------------------------------------|----------|
| $S_{ego}$   | number of LiDAR sensor for ego vehicle       | 10       |
| $S_{other}$ | number of LiDAR sensor for other vehicle     | 0        |
| $S_{ped}$   | number of LiDAR sensor for pedestrian        | 6        |
| $M_{ego}$   | maximal range (m) of LiDAR for ego vehicle   | 200      |
| $M_{other}$ | maximal range (m) of LiDAR for other vehicle | 200      |
| $M_{ped}$   | maximal range (m) of LiDAR for pedestrian    | 100      |
| $D_{ego}$   | braking factor of ego vehicle                | 0.1      |
| $D_{other}$ | braking factor of other vehicle              | 0.05     |
| $D_{ped}$   | braking factor of pedestrian                 | 0.01     |
| $W_{ego}$   | shape size (width, length) of ego vehicle    | [20, 40] |
| $W_{other}$ | shape size (width, length) of other vehicle  | [20, 40] |
| $W_{ped}$   | shape size (width, length) of pedestrian     | [15, 15] |
| $V_{ego}$   | initial velocity of ego vehicle              | 18       |
| $V_{other}$ | initial velocity of other vehicle            | 18       |
| $V_{ped}$   | initial velocity of pedestrian               | 4        |
| $T_{max}$   | max number of step in one episode            | 100      |
| $C$         | collision threshold                          | 20       |
| $\Delta_t$  | step size of running                         | 0.3      |

## B Environment Details

### B.1 Simulator

We conduct all of our experiments in a 2D traffic simulator, where vehicles and pedestrians are controlled by the Bicycle vehicle dynamics. The action is a two-dimensional continuous vector, containing the acceleration and steering. The ego vehicle is controlled by a constant velocity

model and it will decelerate if its Radar detects some obstacles in front of it. All other objects are controlled by the scenario generation algorithm. The parameters of simulators and 3 environments are summarized in Table 3.

## B.2 Definitions of Nodes and Edges in Causal Graph and Behavior Graph

In our experiments, we pre-define the types of nodes and types for Causal Graph and Behavior Graph, which is summarized in Table 4. Both of them share the same definition of node types. Causal Graph does not have the type of edges since it only describes the structure.

Table 4: Definitions of Nodes and Edges

| Notation | Category       | Description                                                    |
|----------|----------------|----------------------------------------------------------------|
| $n_N$    | Node type      | empty node used as a placeholder in the vector                 |
| $n_E$    | Node type      | represents ego vehicle                                         |
| $n_V$    | Node type      | represents non-ego vehicles                                    |
| $n_B$    | Node type      | represents static objects in the scenario                      |
| $n_P$    | Node type      | represents pedestrian                                          |
| $e_N$    | Edge type      | empty edge used as a placeholder in the vector                 |
| $e_T$    | Edge type      | the source node go toward the target node                      |
| $e_S$    | Edge type      | self-loop edge that does not rely on target node               |
| $e_p$    | Edge attribute | the initial 2D position of source node relative to target node |
| $e_v$    | Edge attribute | the initial velocity of source node relative to target node    |
| $e_a$    | Edge attribute | the acceleration of source node relative to target node        |
| $e_s$    | Edge attribute | the shape size of the object in source node                    |

## C Model Training Details

Our model is implemented with PyTorch, using Adam as the optimizer. All experiments are conducted on NVIDIA GTX 1080Ti and Intel i9-9900K CPU@3.60GHz. We summarize the parameters of our model in Table 5. Note that the two variant models (Baseline and Baseline+COM) share the same parameters.

Table 5: Parameters of Environments

| Parameter | Description                 | Value  |
|-----------|-----------------------------|--------|
| $E$       | episode number of REINFORCE | 500    |
| $B$       | Batch size of REINFORCE     | 128    |
| $\alpha$  | learning rate of REINFORCE  | 0.0001 |
| $T$       | sample temperature          | 0.5    |
| $m$       | maximal number of node      | 10     |
| $n$       | number of node type         | 5      |
| $n$       | number of node type         | 5      |
| $h_1$     | number of edge type         | 2      |
| $h_2$     | number of edge attribute    | 3      |
| $K$       | number of flow layer        | 2      |
| $d_h$     | dimension of hidden layer   | 128    |

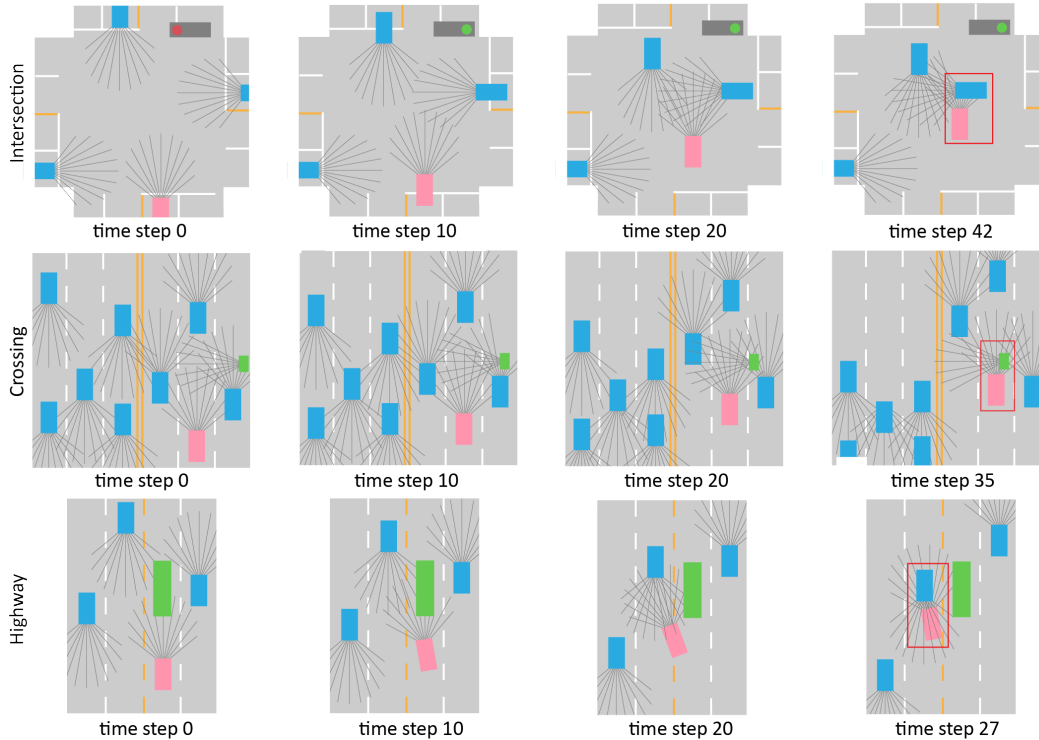

Figure 6: Screenshots of three generated scenarios in our simulator. The pink color represents the ego vehicle, the green color represents the pedestrian, and the blue color represents other vehicles. The red rectangle indicates the occurrence of a collision.

## D More Experiment Results

### D.1 Qualitative Results of Generated Scenarios

We show three qualitative results of generated safety-critical scenarios in Figure 6.

### D.2 Diversity of Generated Scenarios

By injecting the causality into the generation process, we also restrict the space of generated scenario. Therefore, there usually exists a trade-off between the diversity and efficiency of generation. To analyze the diversity we lose by using the causal graph, we plot the variances of velocity and position of vehicles and pedestrians in Figure 7. We can see that the difference between the two models is very small, which indicates that the diversity of our CausalAF method is not decreased due to the injection of the causal graph.

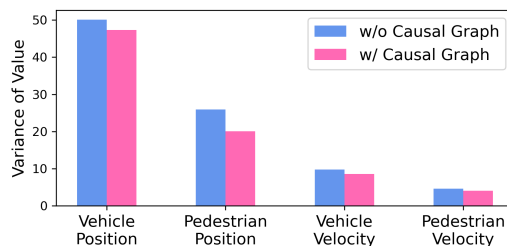

Figure 7: Variance of position and velocity of generated scenarios from two different models. One is with the causal graph and the other is without the causal graph.
